# Supplementary material for: Multidisciplinary proactive e-consults to improve guideline-directed medical therapies for patients with diabetes and chronic kidney disease: an implementation study
Source: PubMed Central journal article supplement — BMJ Open Diabetes Res Care. 2024 May 6;12(3):e004155. doi: 10.1136/bmjdrc-2024-004155 (PMC11085711; doi:10.1136/bmjdrc-2024-004155), 2024-05-06
Supplement: bmjdrc-2024-004155supp001.pdf [file bmjdrc-2024-004155supp001.pdf]

## Multidisciplinary Proactive E-consult for Chronic Kidney Disease and Type 2 Diabetes

### Nephrology Note Template

Dear *PCP Name*,

A multidisciplinary team from primary care, endocrinology, nephrology and pharmacy is working to reduce the progression of diabetic kidney disease for patients at Montefiore.

**This is the first in of a series of two e-consults with recommendations on how to implement maximally tolerated dose of ACE/ARB along with SGLT2 inhibitors to improve outcomes for patients with diabetic kidney disease with proteinuria.**

***Patient's Name*** blood pressure, potassium, GFR, and urine albumin have been reviewed.

**Based on these clinical factors, we recommend a blood pressure goal of  $\leq 130/80$ .  
\*\*\*insert text about maximizing RAASi as a priority, other hypertension medication recommendations to achieve goal, and any additional testing recommended\*\*\***

**\*\*\*IF acute kidney injury present include: Acute kidney injury is noted on laboratory review. Would not recommend starting ACE/ARB at this time. However, you can consider referral to Nephrology.\*\*\***

Monitoring:

- ACE/ARB are generally well tolerated, potential adverse events include: cough, hyperkalemia, or angioedema
- Serum creatinine and potassium 2-4 weeks after starting or changing dose. Goal to increase to maximally tolerated dose.
- If hyperkalemia: consider diuretics, sodium bicarbonate or GI cation exchanges
- If >30% increase in creatinine: correct volume depletion, assess concomitant medications (e.g. diuretics, NSAIDS)
- Reduce dose or stop ACEi or ARB as last resort

If you would like to discuss these recommendations, please reply to this message in the existing telephone encounter.

Sincerely,  
*Nephrologist Name*

## Multidisciplinary Proactive E-consult for Chronic Kidney Disease and Type 2 Diabetes

### Endocrinology Note Template

Dear *PCP Name*,

A multidisciplinary team from primary care, endocrinology, nephrology and pharmacy is working to reduce the progression of diabetic kidney disease for patients at Montefiore.

This is the second in of a series of two e-consults with recommendations on how to implement maximally tolerated dose of ACE/ARB along with SGLT2 inhibitors to improve outcomes for patients with diabetic kidney disease with proteinuria.

**Patient's Name** HbA1C, GFR, and urine albumin and medications have been reviewed.

#### Based on these clinical factors, we recommend:

- **Addition of an SGLT2 inhibitor to slow the progression of proteinuria**
- **Changes to other diabetes medications: \*\*\*insert text about diabetes medication recommendations\*\*\***

See table for SGLT2 coverage based on health insurance formularies. Here is your patient's primary insurance coverage: *Payor information*

- You may access a pre-populated prior authorization form specific to your patients insurer by copy/pasting this link into Internet browser:  
**<https://montefiore.box.com/s/clnp8375ko4wlm3kusabt5yzt6m7hsmi>**
- If your patient's insurance is not listed and you require assistance, please place an **Ambulatory Referral to Medication Management (PharmD)**

If you would like to discuss these recommendations, please reply to this message in the existing telephone encounter.

Sincerely,  
*Endocrinologist Name*

More tips for initiating SGLT2 inhibitors:

- It is important to counsel on potential adverse events including: increased risk of genitourinary infections, dehydration (particularly for elderly), and risk for euglycemic ketoacidosis (avoid very low carbohydrate diets, excess alcohol intake, dehydration)
- Metabolic monitoring includes: 1) Renal function, a modest and non-progressive increase in the plasma creatinine may occur and is generally not an indication to discontinue therapy, 2) Glucose for hypoglycemia if used in conjunction with insulin and/or sulfonylureas
- Hold SGLT2 inhibitors 3 days prior (4 days prior for ertugliflozin) to any surgery which requires patient to be NPO. Resume when oral intake is at baseline
