# Supplementary material for: Multidisciplinary proactive e-consults to improve guideline-directed medical therapies for patients with diabetes and chronic kidney disease: an implementation study
Source: PubMed Central journal article supplement — BMJ Open Diabetes Res Care. 2024 May 6;12(3):e004155. doi: 10.1136/bmjdrc-2024-004155 (PMC11085711; doi:10.1136/bmjdrc-2024-004155), 2024-05-06
Supplement: bmjdrc-2024-004155supp002.pdf [file bmjdrc-2024-004155supp002.pdf]

## Multidisciplinary Proactive E-consult for Chronic Kidney Disease and Type 2 Diabetes

### Interview Guide

First let's start with your assessment of the intervention overall.

| Interview question                                                                                                                                                                                                                                                                                                                                                                                                                                                                                                                                                                                                               | Conceptual construct                 | CFIR resource                                                                                                                                                                                                                                                                                                              |
|----------------------------------------------------------------------------------------------------------------------------------------------------------------------------------------------------------------------------------------------------------------------------------------------------------------------------------------------------------------------------------------------------------------------------------------------------------------------------------------------------------------------------------------------------------------------------------------------------------------------------------|--------------------------------------|----------------------------------------------------------------------------------------------------------------------------------------------------------------------------------------------------------------------------------------------------------------------------------------------------------------------------|
| <p>1. First what do you think of the intervention now that you have some experience with it?</p> <p><i>(Probe):</i></p> <p>What did you like? Not like? Ask for examples.</p>                                                                                                                                                                                                                                                                                                                                                                                                                                                    | Open ended introduction              | <i>You will have to be listening with a "third ear" for the constructs in CFIR and probe to be sure you can code them. Maybe have a list of the codes you might use and be sure the respondent's answer is clear enough that you can code it. For example: barriers, facilitators, mediators, individual beliefs, etc.</i> |
| <p>2. If scaled, do you think this intervention will help you manage your patients' diabetic kidney disease?</p> <p>2a. What are some of the reasons you think the intervention will help? won't help?</p> <p>2b. Do you think targeting disease management will help your patients in the long run?</p> <p>2c. Do you think targeting the prescribing of and actual access to DKD medications will help your patients?</p>                                                                                                                                                                                                      | Effectiveness<br><br>Appropriateness | CFIR Characteristics of Individuals: Knowledge and Beliefs about the Intervention<br><br>CFIR Intervention Characteristics: Compatibility                                                                                                                                                                                  |
| <p>3. Do you think the intervention will help meet the needs of your patients in the future?</p> <p>3a. Was the patient appropriate/not appropriate for the intervention? In what way?</p> <p>3b. In what ways might the intervention meet their needs? (Improved access to medications or Improved access to specialist expertise)</p> <p>3c. Did you experience barriers implementing the intervention with your patients?</p> <p><i>(Probe):</i></p> <p>In what ways might the intervention not meet their needs?</p> <p>(For example, cost, side effects, too many medications, difficulties with medication management)</p> | Appropriateness                      | CFIR Inner Setting: Patient Needs and Resources                                                                                                                                                                                                                                                                            |

**Now I am going to ask about some specific aspects of the intervention.**

| Interview question                                                                                                                                                                                                                                                                                                                                                                                                                                                                                                                                                                                                                                                                                 | Conceptual construct                             | CFIR resource                                                                                                                                                                       |
|----------------------------------------------------------------------------------------------------------------------------------------------------------------------------------------------------------------------------------------------------------------------------------------------------------------------------------------------------------------------------------------------------------------------------------------------------------------------------------------------------------------------------------------------------------------------------------------------------------------------------------------------------------------------------------------------------|--------------------------------------------------|-------------------------------------------------------------------------------------------------------------------------------------------------------------------------------------|
| <p>4. Did you have the opportunity to read the note from the Nephrologist?</p> <p>(IF NO): Was there a specific reason?</p> <p>5. Did you have the opportunity to read the note from the Endocrinologist?</p> <p>(IF NO): Was there a specific reason?</p> <p><b>(IF NO TO BOTH SKIP FOLLOWING QUESTION)</b></p>                                                                                                                                                                                                                                                                                                                                                                                   | <p>Feasibility</p> <p>Acceptability</p>          | <p>CFIR Intervention Characteristics: Design Quality and Packaging</p>                                                                                                              |
| <p>6. <b>Overall</b>, what did you think about receiving notes from the Nephrologist? How about from the Endocrinologist?</p> <p><i>(Probe):</i></p> <p>Can you provide some examples of what you liked or did not like?</p> <p>6a. What do you think are likely issues or complications that may arise in the future with this intervention?</p> <p>6b. How well did the intervention fit with existing work processes and practices in your setting?</p> <p><i>Be prepared that providers may hijack the interview to tell you what they want to tell you which may not fit the questions you are asking. Let them tell you what is important to them and then go back to the questions.</i></p> | <p>Feasibility, acceptability, effectiveness</p> | <p>CFIR Intervention Characteristics: Design Quality and Packaging</p> <p>CFIR Intervention Characteristics: Compatibility</p> <p>CFIR Intervention Characteristics: Complexity</p> |
| <p>7. This intervention aims to enhance <b>multidisciplinary collaboration</b>. Do you think we succeeded?</p> <p>7a. What is your perception of the quality of the multidisciplinary collaboration?</p> <p>7b. How was the tone, delivery, and credibility of the communication with the Nephrologist?</p> <p>7c. How was the tone, delivery, and credibility of the communication with the Endocrinologist?</p>                                                                                                                                                                                                                                                                                  | <p>Acceptability</p>                             | <p>CFIR Intervention Characteristics: Design Quality and Packaging</p>                                                                                                              |

|                                                                                                                                                                                                                                                                                                                                                                                                                                                                   |                                                              |                                                                                                                                                                                         |
|-------------------------------------------------------------------------------------------------------------------------------------------------------------------------------------------------------------------------------------------------------------------------------------------------------------------------------------------------------------------------------------------------------------------------------------------------------------------|--------------------------------------------------------------|-----------------------------------------------------------------------------------------------------------------------------------------------------------------------------------------|
| <p>8. Did you find the intervention <b>content</b>, meaning the note content from both the endocrinologist and the nephrologist, useful?</p> <p><i>(Probe):</i></p> <p>Can you think of any examples?</p>                                                                                                                                                                                                                                                         | Appropriateness                                              | <p>CFIR Intervention Characteristics: Design Quality and Packaging</p> <p>CFIR Intervention Characteristics: Compatibility</p>                                                          |
| <p>9. How <b>confident were you implementing</b> the recommendations from the intervention?</p> <p>9a. What gave you that level of confidence (or lack of confidence)?</p> <p><i>After this intervention for your patient:</i></p> <p>9b. How confident do you feel about prescribing and insuring access to DKD medications?</p> <p>9c. How confident are you that you are impacting disease monitoring (scheduled lab tests and monitoring blood pressure)?</p> | Acceptability                                                | CFIR Characteristics of Individuals: Self-efficacy                                                                                                                                      |
| <p>10. Did you have the opportunity to implement recommendations from the Nephrologist?</p> <p>(IF NO): Is there a specific reason?</p> <p>11. Did you have the opportunity to implement recommendations from the Endocrinologist?</p> <p>(IF NO): Is there a specific reason?</p>                                                                                                                                                                                | <p>Feasibility</p> <p>Effectiveness</p> <p>Acceptability</p> | <p>CFIR Intervention Characteristics: Design Quality and Packaging</p> <p>CFIR Characteristics of Individuals: Self-efficacy</p> <p>CFIR Inner Setting: Patient Needs and Resources</p> |
| <p>12. What <b>changes</b> do you think we should make to the intervention?</p> <p><i>(Probe):</i></p> <p>Consider timing, number of steps involved, content of recommendations?</p> <p>12a. Are there any components of the intervention that should not be altered?</p> <p><i>(Probe):</i></p> <p>Could you please provide some examples?</p>                                                                                                                   | Feasibility, acceptability, effectiveness                    | CFIR Intervention Characteristics: Adaptability                                                                                                                                         |

|                                                                                                                  |  |  |
|------------------------------------------------------------------------------------------------------------------|--|--|
| 13. Do you have any additional comments or concerns you would like to discuss before we conclude this interview? |  |  |
|------------------------------------------------------------------------------------------------------------------|--|--|
